# Supplementary material
Source: Springer Nature journal article supplement (https://www.springermedizin.de/resource/supplementary/12943_2009_615_MOESM3_ESM.PDF/9554408)

Profile of chromosome 8 for all samples in the present study

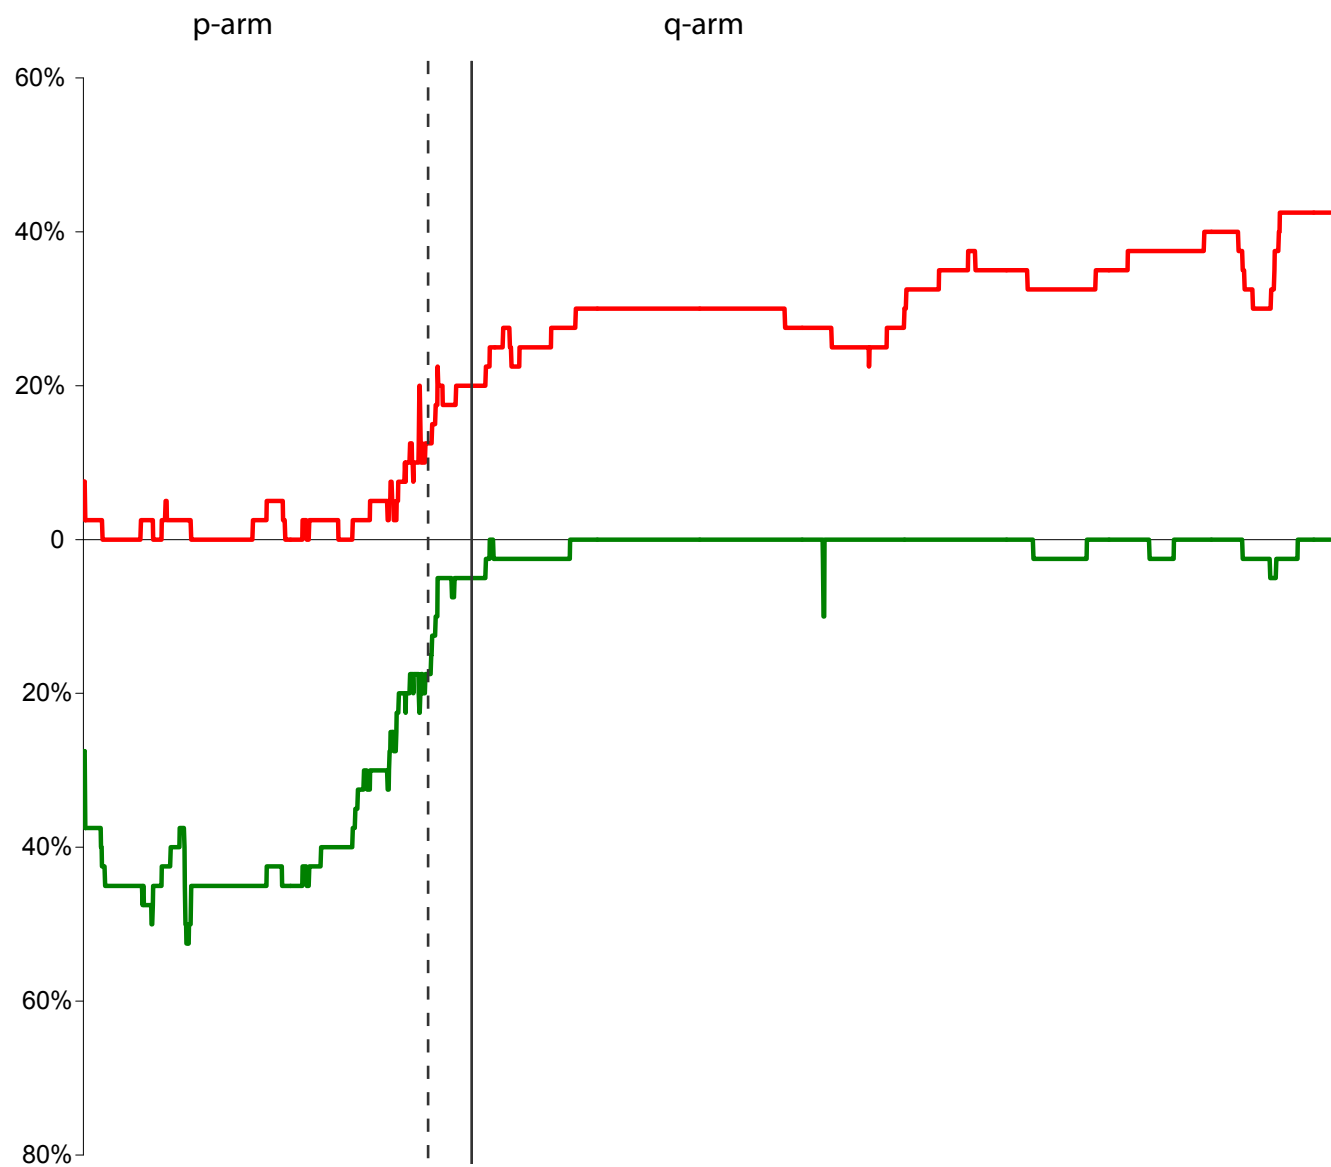

Supplement: MOESM3 [file 9554408]
